# Supplementary material for: Ambient air pollution is associated with airway inflammation in older women: a nested cross-sectional analysis
Source: PubMed Central journal article supplement — BMJ Open Respir Res. 2020 Mar 24;7(1):e000549. doi: 10.1136/bmjresp-2019-000549 (PMC7206912; doi:10.1136/bmjresp-2019-000549), 2020-03-24
Supplement: bmjresp-2019-000549supp001.pdf [file bmjresp-2019-000549supp001.pdf]

## AMBIENT AIR POLLUTION IS ASSOCIATED WITH AIRWAY INFLAMMATION IN OLDER WOMEN: a nested cross-sectional analysis

Michael J Abramson<sup>1</sup>, Claudia Wigmann<sup>2</sup>, Hicran Altug<sup>2</sup>, Tamara Schikowski<sup>2</sup>

1. School of Public Health & Preventive Medicine, Monash University, Melbourne, Australia
2. Umweltepidemiologie von Lunge, Gehirn und Hautalterung, IUF – Leibniz Research Institute for Environmental Medicine, Düsseldorf, Germany

### SUPPLEMENT

Figure S1. Distributions of FeNO (ppb) and log<sub>e</sub>FeNO in all participants (n=236)

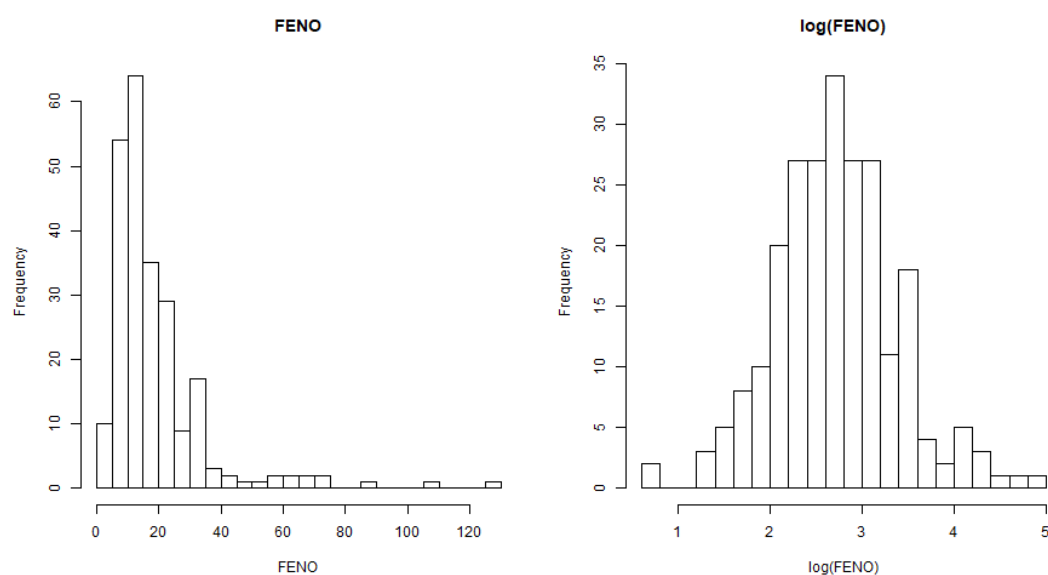

Table S1. Proportional changes (and 95% confidence intervals) in FeNO for an interquartile range in each pollutant or exposure in all participants (n=236). Estimates were adjusted for age, height, weight, current and former smoking, SHS exposure, urban/rural residence, socio-economic status and the FeNO measuring equipment.

| Pollutant/Exposure             | Change      | 95%CI             | p-value     |
|--------------------------------|-------------|-------------------|-------------|
| NO <sub>2</sub>                | 1.07        | 0.95, 1.21        | 0.24        |
| NO <sub>x</sub>                | 1.06        | 0.94, 1.20        | 0.31        |
| PM <sub>10</sub>               | 1.13        | 1.01, 1.26        | 0.036       |
| PM <sub>coarse</sub>           | 1.04        | 0.92, 1.16        | 0.54        |
| PM <sub>2.5</sub>              | 1.20        | 1.04, 1.39        | 0.013       |
| PM <sub>2.5</sub> absorbance   | 1.10        | 1.01, 1.20        | 0.023       |
| Major road length < 1km buffer | <b>1.09</b> | <b>0.99, 1.20</b> | <b>0.08</b> |
| O <sub>3</sub>                 | 0.40        | 0.088, 1.84       | 0.24        |

Table S2. Proportional changes (and 95% confidence intervals) in FeNO for an interquartile range in each pollutant or exposure with in participants with chronic inflammatory respiratory conditions (n=71). Estimates were adjusted for age, height, weight, current and former smoking, SHS exposure, urban/rural residence, socio-economic status and the FeNO measuring equipment.

| <b>Pollutant/Exposure</b>      | <b>Change</b> | <b>95%CI</b>      | <b>p-value</b> |
|--------------------------------|---------------|-------------------|----------------|
| NO <sub>2</sub>                | 1.02          | 0.77, 1.35        | 0.91           |
| NO <sub>x</sub>                | 1.01          | 0.76, 1.34        | 0.94           |
| PM <sub>10</sub>               | 1.32          | 1.04, 1.68        | 0.023          |
| PM <sub>coarse</sub>           | 1.17          | 0.90, 1.52        | 0.25           |
| PM <sub>2.5</sub>              | 1.68          | 1.24, 2.26        | 0.001          |
| PM <sub>2.5</sub> absorbance   | 1.15          | 0.94, 1.41        | 0.16           |
| Major road length < 1km buffer | <b>1.14</b>   | <b>0.95, 1.37</b> | <b>0.15</b>    |
| O <sub>3</sub>                 | 0.37          | 0.02, 9.11        | 0.54           |

Table S3. Proportional changes (and 95% confidence intervals) in FeNO for an interquartile range in each pollutant or exposure for participants with chronic inflammatory respiratory conditions or lung function below the lower limit of normal (n=99). Estimates were adjusted for age, height, weight, current and former smoking, SHS exposure, urban/rural residence, socio-economic status and the FeNO measuring equipment.

| <b>Pollutant/Exposure</b>      | <b>Change</b> | <b>95%CI</b>      | <b>p-value</b> |
|--------------------------------|---------------|-------------------|----------------|
| NO <sub>2</sub>                | 1.06          | 0.84, 1.34        | 0.61           |
| NO <sub>x</sub>                | 0.97          | 0.76, 1.24        | 0.83           |
| PM <sub>10</sub>               | 1.26          | 1.05, 1.52        | 0.012          |
| PM <sub>coarse</sub>           | 1.08          | 0.90, 1.29        | 0.43           |
| PM <sub>2.5</sub>              | 1.46          | 1.14, 1.86        | 0.003          |
| PM <sub>2.5</sub> absorbance   | 1.18          | 1.02, 1.37        | 0.026          |
| Major road length < 1km buffer | <b>1.14</b>   | <b>0.99, 1.32</b> | <b>0.07</b>    |
| O <sub>3</sub>                 | 0.27          | 0.02, 3.90        | 0.34           |
